# Supplementary material for: Resveratrol attenuates dapagliflozin-induced renal gluconeogenesis via activating the PI3K/Akt pathway and suppressing the FoxO1 pathway in type 2 diabetes
Source: Royal Society of Chemistry journal article supplement (doi:10.1039/d0fo02387f), 2020-12-18
Supplement: d0fo02387f1.pdf [file d0fo02387f1.pdf]

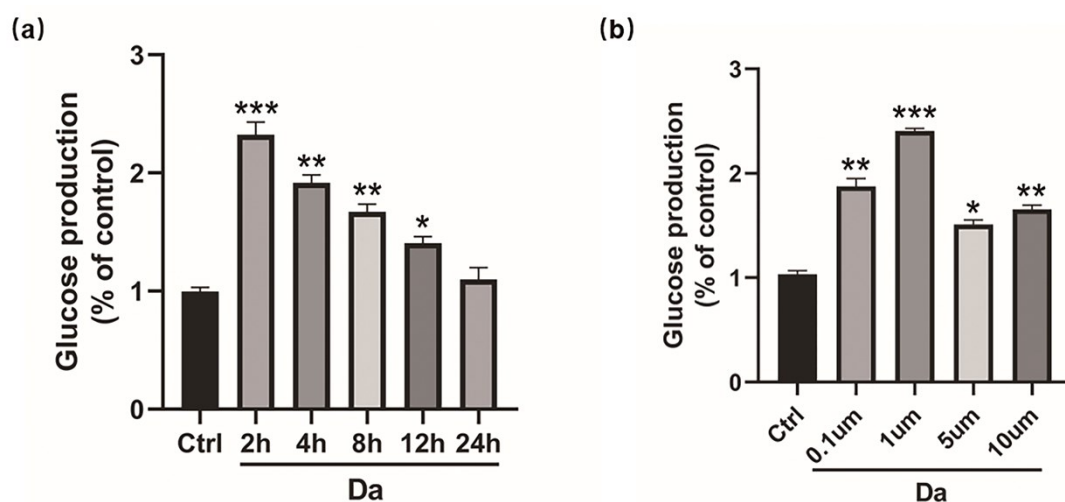

**Figure S1** HepG2 cells were incubated with dapagliflozin (Da) for different time (a) and concentration (b). Values are presented as mean  $\pm$  SD. \* $P$  < 0.05, \*\* $P$  < 0.01 and \*\*\* $P$  < 0.001 vs. control group.

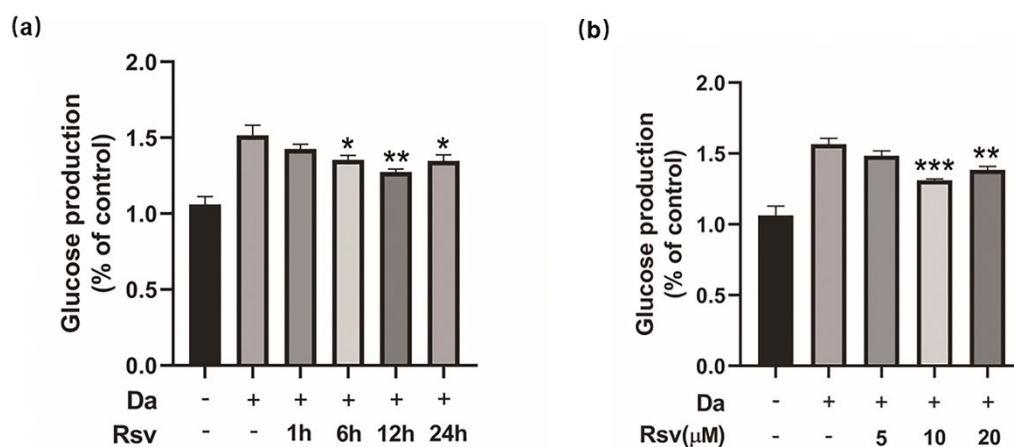

**Figure S2** Resveratrol (Rsv) attenuated dapagliflozin (Da)-induced glucose production with various time (a) and concentration (b). Values are presented as mean  $\pm$  SD. \* $P$  < 0.05, \*\* $P$  < 0.01 and \*\*\* $P$  < 0.001 vs. Da group.
